# Supplementary material for: PUP-Fuse: Prediction of Protein Pupylation Sites by Integrating Multiple Sequence Representations
Source: PubMed Central journal article supplement (PMC7924619; doi:10.3390/ijms22042120), 2021-02-20
Supplement: ijms-22-02120-s001.pdf [file ijms-22-02120-s001.pdf]

Supplementary information

## **PUP-Fuse: Prediction of Protein Pupylation Sites by Integrating Multiple Sequence Representations**

Firda Nurul Auliah<sup>1</sup>, Andi Nur Nilamyani<sup>1</sup>, Watshara Shoombuatong<sup>2</sup>, Md Ashad Alam<sup>3</sup>, Md Mehedi Hasan<sup>1,4</sup>, and Hiroyuki Kurata<sup>1\*</sup>

**Table S1.** Prediction performance after the removal of 30% sequence redundancy on the training dataset.

| Encoding method | Sens  | Spec  | Acc   | MCC   | AUC   |
|-----------------|-------|-------|-------|-------|-------|
| AAI             | 0.475 | 0.810 | 0.643 | 0.310 | 0.659 |
| Binary          | 0.502 | 0.805 | 0.654 | 0.329 | 0.691 |
| pbCKSAAP        | 0.769 | 0.815 | 0.792 | 0.585 | 0.880 |
| TPC             | 0.761 | 0.811 | 0.786 | 0.580 | 0.866 |
| CKSAAP          | 0.764 | 0.810 | 0.787 | 0.577 | 0.872 |
| Pup-Fuse        | 0.781 | 0.824 | 0.803 | 0.615 | 0.903 |

The PUP-Fuse is the linear combination of the RF scores estimated by AAI, Binary, pbCKSAAP, CKSAAP, and TPC encodings and their weight coefficient are 0.1, 0.1, 0.4, 0.25, and 0.15 respectively.

**Table S2.** Fifteen types of AAI properties used in this study

| AAI_ID     | A     | R     | N     | D     | C     | Q     | E     | G    | H     | I     | L     | K     | M     | F     | P     | S     | T     | W     | Y     |
|------------|-------|-------|-------|-------|-------|-------|-------|------|-------|-------|-------|-------|-------|-------|-------|-------|-------|-------|-------|
| JANJ780103 | 15    | 67.   | 49.   | 50.   | 5.    | 56.   | 55.   | 10   | 34.   | 13.   | 16.   | 85.   | 20.   | 10.   | 45.   | 32.   | 32.   | 17.   | 41.   |
| KANM800102 | 0.81  | 0.85  | 0.62  | 0.71  | 1.17  | 0.98  | 0.53  | 0.88 | 0.92  | 1.48  | 1.24  | 0.77  | 1.05  | 1.20  | 0.61  | 0.92  | 1.18  | 1.18  | 1.23  |
| GEIM800107 | 0.91  | 0.99  | 0.72  | 0.74  | 1.12  | 0.90  | 0.41  | 0.91 | 1.01  | 1.29  | 1.23  | 0.86  | 0.96  | 1.26  | 0.65  | 0.93  | 1.05  | 1.15  | 1.21  |
| GOLD730102 | 88.3  | 18.12 | 12.51 | 11.08 | 11.24 | 14.87 | 14.05 | 60.0 | 15.26 | 16.85 | 16.85 | 17.56 | 16.22 | 18.90 | 12.22 | 88.7  | 11.82 | 22.70 | 19.30 |
| JOND920102 | 10.0  | 83.   | 10.4  | 86.   | 44.   | 84.   | 77.   | 50   | 91.   | 10.3  | 54.   | 72.   | 93.   | 51.   | 58.   | 11.7  | 10.7  | 25.   | 50.   |
| FINA910102 | 1.    | 0.70  | 1.    | 1.70  | 1.    | 1.    | 1.70  | 1.30 | 1.    | 1.    | 1.    | 0.70  | 1.    | 1.    | 13.   | 1.    | 1.    | 1.    | 1.    |
| GEIM800108 | 0.91  | 1.    | 1.64  | 1.40  | 0.93  | 0.94  | 0.97  | 1.51 | 0.90  | 0.65  | 0.59  | 0.82  | 0.58  | 0.72  | 1.66  | 1.23  | 1.04  | 0.67  | 0.92  |
| FAUJ880104 | 2.87  | 7.82  | 4.58  | 4.74  | 4.47  | 6.11  | 5.97  | 2.06 | 5.23  | 4.92  | 4.92  | 6.89  | 6.36  | 4.62  | 4.11  | 3.97  | 4.11  | 7.68  | 4.73  |
| GEIM800105 | 0.84  | 1.04  | 0.66  | 0.59  | 1.27  | 1.02  | 0.57  | 0.94 | 0.81  | 1.29  | 1.10  | 0.86  | 0.88  | 1.15  | 0.80  | 1.05  | 1.20  | 1.15  | 1.39  |
| FASG760101 | 89.09 | 17.42 | 13.21 | 13.31 | 12.11 | 14.61 | 14.71 | 75.0 | 15.51 | 13.11 | 13.11 | 14.61 | 14.92 | 16.51 | 11.51 | 10.50 | 11.91 | 20.42 | 18.11 |
| FASG760102 | 29.7  | 23.8  | 23.6  | 27.0  | 17.8  | 18.5  | 24.9  | 29.0 | 27.7  | 28.4  | 33.7  | 22.4  | 28.3  | 28.4  | 22.2  | 22.8  | 25.3  | 28.2  | 34.4  |
| GEIM800102 | 1.13  | 1.09  | 1.06  | 0.94  | 1.32  | 0.93  | 1.20  | 0.83 | 1.09  | 1.05  | 1.13  | 1.08  | 1.23  | 1.01  | 0.82  | 1.01  | 1.17  | 1.32  | 0.88  |
| JANJ780102 | 51    | 5.    | 22.   | 19.   | 74.   | 16.   | 16.   | 52   | 34.   | 66.   | 60.   | 3.    | 52.   | 58.   | 25.   | 35.   | 30.   | 49.   | 24.   |
| MIYS990104 | -0.04 | 0.07  | 0.13  | 0.19  | -0.38 | 0.14  | 0.23  | 0.09 | -0.04 | -0.34 | -0.37 | 0.33  | -0.30 | -0.38 | 0.19  | 0.12  | 0.03  | -0.33 | -0.29 |
| PUNT030101 | -0.17 | 0.37  | 0.18  | 0.37  | -0.06 | 0.26  | 0.15  | 0.01 | -0.02 | -0.28 | -0.28 | 0.32  | -0.26 | -0.41 | 0.13  | 0.05  | 0.02  | -0.15 | -0.09 |

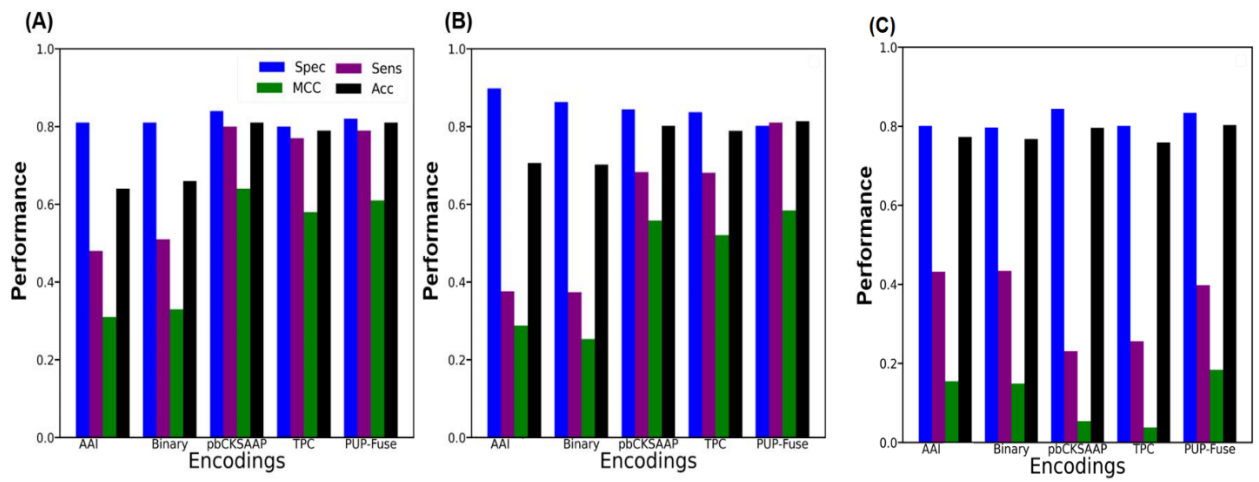

Figure S1. Comparison of 1:1, 1:2, and 1:all ratios of positive-to-negative samples on training dataset.

(A) 1:1 ratio. (B) 1:2 ratio. (C) 1:all ratio.

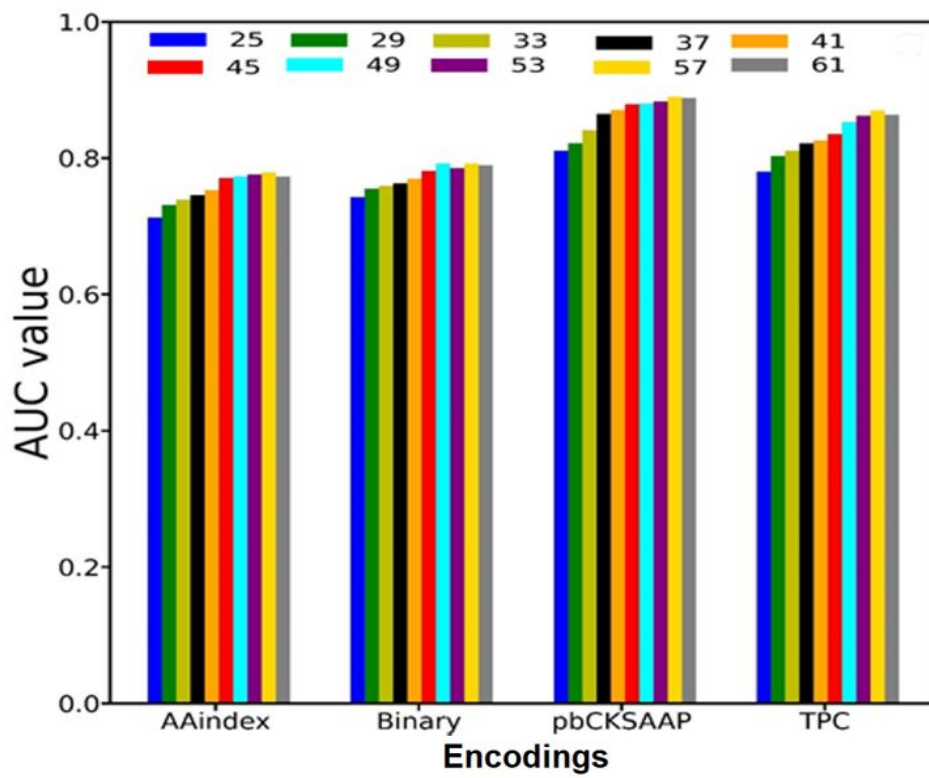

Figure S2. AUC values for different window sizes based on 10-fold cross-validation tests.

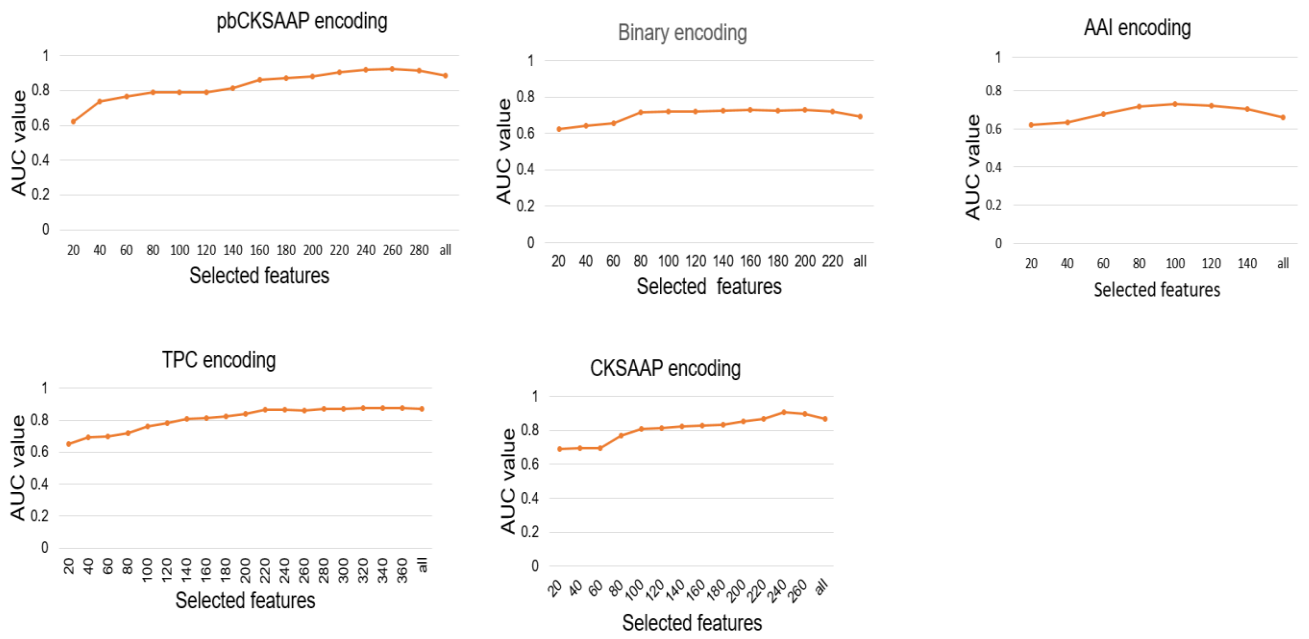

Figure S3. AUC value with respect to selected features for the five encoding schemes.
